# Supplementary material for: The comparison of the lactation and milk yield and composition of selected breeds of sheep and goats
Source: PubMed Central journal article supplement — Transl Anim Sci. 2017 Dec 1;1(4):498–506. doi: 10.2527/tas2017.0056 (PMC7204986; doi:10.2527/tas2017.0056), 2017-12-01
Supplement: appendix_1.pdf [file appendix_1.pdf]

## APPENDIX 1. REFERENCES USED TO DEVELOP THE DATABASE.

### Sheep Breeds

- Abbeddou, S., B. Rischkowsky, M. E. D. Hilali, M. Haylani, D. H. Hans, and M. Kreuzer. 2014. Supplementing diets of Awassi ewes with olive cake and tomato pomace: on-farm recovery of effects on yield, composition and fatty acid profile of the milk. *Tropical Animal Health and Production*. 47:145-152.
- Abbeddou, S., B. Rischkowsky, E. K. Richter, H. D. Hess, and M. Kreuzer. 2011. Modification of milk fatty acid composition by feeding forages and agro-industrial byproducts from dry areas to awassi sheep. *Journal of Dairy Science*. 94:4657-4668.
- Afolayan, R. A., N. M. Fogarty, J. E. Morgan, G. M. Gaunt, L. J. Cummins, A. R. Gilmour, and S. Nielsen. 2009. Genetic analysis of milk production and composition in crossbred ewes from different maternal genotypes. *Animal Production Science*. 49:24-31.
- Antunac, N., B. Mioc, N. Mikulec, S. Kalit, M. Pecina, J. Havranek, and V. Pavić. 2007. Utjecaj paragenetskih čimbenika na proizvodnju i kvalitetu mlijeka istočnofrizijskih ovaca u Hrvatskoj. *Mljekarstvo*. 57:195-208.
- Arias, R., B. Oliete, M. Ramón, C. Arias, R. Gallego, V. Montoro, C. Gonzalo, and M. D. Pérez-Guzmán. 2012. Long-term study of environmental effects on test-day somatic cell count and milk yield in Manchega sheep. *Small Ruminant Research*. 106:92-97.
- Awawdeh, M. S., A. Q. Talafha, and B. S. Obeidat. 2015. Postpartum injection with vitamin E and selenium failed to improve the performance of Awassi ewes and their lambs. *Canadian Journal of Animal Science*. 95:111-115.
- Baldwin, J. A., G. M. J. Horton, J. E. Wohlt, D. D. Palatini, and S. M. Emanuele. 1993. Rumen-protected methionine for lactation, wool and growth in sheep. *Small Ruminant Research*. 12:125-132.
- Bencini, R., and I. W. Purvis. 1990. The yield and composition of milk from Merino sheep. *Australian Society of Animal Production*. 18:144-147.
- Bianchi, A. E., V. P. Macedo, R. T. França, S. T. A. Lopes, L. S. Lopes, L. M. Stefani, A. Volpato, H. L. Lima, D. Paiano, G. Machado, and A. S. Da Silva. 2014. Effect of adding palm oil to the diet of dairy sheep on milk production and composition, function of liver and kidney, and the concentration of cholesterol, triglycerides and progesterone in blood serum. *Small Ruminant Research*. 117:78-83.
- Bingöl, M., T. Aygün, Ö. Gökdal, and A. Yilmaz. 2005. Some factors affecting milk production and post partum body weight of Fat-Tailed Norduz ewes in Turkey. *Journal of Applied Animal Research*. 27:125-127.
- Buccioni, A., M. Pauselli, C. Viti, S. Minieri, G. Pallara, V. Roscini, S. Rapaccini, M. T. Marinucci, P. Lupi, G. Conte, and M. Mele. 2015. Milk fatty acid composition, rumen microbial population, and animal performances in response to diets rich in linoleic acid supplemented with chestnut or quebracho tannins in dairy ewes. *Journal of Dairy Science*. 98:1145-1156.
- Caballero, R., J. Rióperéz, E. Fernández, M. Arauzo, and P. J. Hernaiz. 1992. Performance of Manchega ewes grazing cereal stubbles and cultivated pastures. *Small Ruminant Research*. 7:315-329.
- Cabiddu, A., M. Addis, M. Fiori, S. Spada, M. Decandia, and G. Molle. 2017. Pros and cons of the supplementation with oilseed enriched concentrates on milk fatty acid profile of dairy sheep grazing Mediterranean pastures. *Small Ruminant Research*. 147:63-72.
- Cannas, A., A. Pes, R. Mancuso, B. Vodret, and A. Nudda. 1998. Effect of dietary energy and protein concentration on the concentration of milk urea nitrogen in dairy ewes. *Journal of Dairy Science*. 81:499-508.
- Caroprese, M., M. Albenzio, A. Marzano, L. Schena, G. Annicchiarico, and A. Sevi. 2010. Relationship between cortisol response to stress and behavior, immune profile, and production performance of dairy ewes. *Journal of Dairy Science*. 93:2395-2403.
- Casamassima, D., R. Pizzo, M. Palazzo, A. G. D'Alessandro, and G. Martemucci. 2008. Effect of water restriction on productive performance and blood parameters in comisana sheep reared under intensive condition. *Small Ruminant Research*. 78:169-175.

- Cavani, C., L. Bianconi, M. Manfredini, L. Rizzi, and M. C. Zarri. 1991. Effects of a complete diet on the qualitative characteristics of ewe milk and cheese. *Small Ruminant Research*. 5:273-284.
- Chiofalo, B., L. Liotta, A. Zumbo, and V. Chiofalo. 2004. Administration of olive cake for ewe feeding: Effect on milk yield and composition. *Small Ruminant Research*. 55:169-176.
- Corbett, J. L. 1968. Variation in the yield and composition of milk of grazing merino ewes. *Australian Journal of Agricultural Research*. 19:283-294.
- Fadel, I., J. B. Owen, R. Kassem, and H. Juha. 1989. A note on the milk composition of Awassi Ewes. *Animal Production*. 48:606-610.
- Fegeros, K., G. Zervas, F. Apsokardos, J. Vastardis, and E. Apostolaki. 1995. Nutritive evaluation of ammonia treated olive tree leaves for lactating sheep. *Small Ruminant Research*. 17:9-15.
- Geenty, K. G. 1979. Lactation performance, composition growth, and of sheep. *New Zealand Journal of Agricultural Research*. 22:241-250.
- Geenty, K. G., and P. G. Davison. 1982. Influence of weaning age, milking frequency, and udder stimulation on dairy milk production and post-partum oestrus interval of Dorset ewes. *New Zealand Journal of Experimental Agriculture*. 10:1-5.
- Geenty, K. G., and A. R. Sykes. 1986. Effect of herbage allowance during pregnancy and lactation on feed intake, milk production, body composition and energy utilization of ewes at pasture. *Journal of Agricultural Science*. 106:351-367.
- Gelasakis, A. I., G. Arsenos, G. E. Valergakis, G. Oikonomou, E. Kioussis, and G. C. Fthenakis. 2012. Study of factors affecting udder traits and assessment of their interrelationships with milking efficiency in Chios breed ewes. *Small Ruminant Research*. 103:232-239.
- Giannenas, I., J. Skoufos, C. Giannakopoulos, M. Wiemann, O. Gortzi, S. Lalas, and I. Kyriazakis. 2011. Effects of essential oils on milk production, milk composition, and rumen microbiota in Chios dairy ewes. *Journal of Dairy Science*. 94:5569-5577.
- Gómez-Cortés, P., A. Bach, P. Luna, M. Juárez, and M. A. d. I. Fuente. 2009. Effects of extruded linseed supplementation on n-3 fatty acids and conjugated linoleic acid in milk and cheese from ewes. *Journal of Dairy Science*. 92:4122-4134.
- Hadjipanayiotou, M. 1992. The effect of protein source on the performance of suckling Chios ewes and Damascus goats. *Small Ruminant Research*. 8:185-197.
- Hashem, N. M., and S. Z. EL-Zarkoun. 2016. Postpartum associated metabolism, milk production and reproductive efficiency of Barki and Rahmani subtropical Fat-tailed breeds. *Asian Journal of Animal and Veterinary Advances*. 11:184-189.
- Hatziminaoglou, I., A. Georgoudis, and A. Karalazos. 1990. Factors affecting milk yield and prolificacy of Karagouniko sheep in West Thessaly (Greece). *Livestock Production Science*. 24:181-186.
- Hernandez, F., L. Elvira, J.-V. Gonzalez-Martin, A. Gonzales-Bulnes, and S. Astiz. 2011. Influence of age at first lambing on reproductive and productive performance of Lacaune dairy sheep under an intensive management system. *Journal of Dairy Research*. 78:160-167.
- Hilali, M., L. Iñiguez, W. Knaus, M. Schreiner, M. Wurzinger, and H. K. Mayer. 2011. Dietary supplementation with nonconventional feeds from the middle east: assessing the effects on physicochemical and organoleptic properties of awassi sheep milk and yogurt. *Journal of Dairy Science*. 94:5737-5749.
- Husvéth, F., E. Galamb, T. Gaál, K. Duplecz, L. Wágner, and L. Pál. 2010. Milk production, milk composition, liver lipid contents and C18 fatty acid composition of milk and liver lipids in Awassi ewes fed a diet supplemented with protected cis-9, trans-11 and trans-10, cis-12 conjugated linoleic acid (CLA) isomers. *Small Ruminant Research*. 94:25-31.
- Izadifard, J., and M. J. Zamiri. 1997. Lactation performance of two Iranian fat-tailed sheep breeds. *Small Ruminant Research*. 24:69-76.

- Knight, T. W., R. Bencini, N. A. Haack, and A. F. Death. 1993. Effects of shearing on milk yields and milk composition in machine-milked Dorset ewes. *New Zealand Journal of Agricultural Research*. 36:123-132.
- Knight, T. W., L. S. Gosling, and H. A. Dick. 1994. Effects of hogget oestrus and the lambing and milking of hoggets on the subsequent milk composition and yields of 2-year-old Dorset ewes. *New Zealand Journal of Agricultural Research*. 38:197-204.
- Koutsouli, P., P. Simitzis, G. Theodorou, T. Massouras, I. Bizelis, and I. Politis. 2017. The effect of milking frequency reduction from twice to once daily on mammary physiology and animal welfare of two dairy Greek sheep breeds. *Small Ruminant Research*. 147:18-24.
- Kremer, R., and L. Rosés. 2016. Producción y composición de leche de ovejas Frisona-Milchschaef ordeñadas 1 o 2 veces diarias. *Veterinaria*. 204:22-28.
- Kuchtík, J., K. Šustová, T. Urban, and D. Zapletal. 2008. Effect of the stage of lactation on milk composition, its properties and the quality of rennet curdling in East Friesian ewes. *Czech Journal of Animal Science*. 53:55-63.
- Luna, P., A. Bach, M. Juárez, and M. A. d. I. Fuente. 2008. Influence of diets rich in flax seed and sunflower oil on the fatty acid composition of ewes' milk fat especially on the level of conjugated linoleic acid, n-3 and n-6 fatty acids. *International Dairy Journal*. 18:99-107.
- Macciotta, N. P. P., A. Cappio-Borlino, and G. Pulina. 1999. Analysis of environmental effects on test day milk yields of sarda dairy ewes. *Journal of Dairy Science*. 82:2212-2217.
- McKusick, B. C., D. L. Thomas, and Y. M. Berger. 2001. Effect of weaning system on commercial milk production and lamb growth of east friesian dairy sheep. *Journal of Dairy Science*. 84:1660-1668.
- Molina, E., A. Ferret, G. Caja, S. Calsamiglia, X. Such, and J. Gasa. 2001. Comparison of voluntary food intake, apparent digestibility, digesta kinetics and digestive tract content in Manchega and Lacaune dairy sheep in late pregnancy and early and mid lactation. *Animal Science*. 72:209-221.
- Morgan, J. E., N. M. Fogarty, S. Nielsen, and A. R. Gilmour. 2006. Milk yield and milk composition from grazing primiparous non-dairy crossbred ewes. *Australian Journal of Agricultural Research*. 57:377-387.
- Nezamidoust, M., M. Alikhani, G. R. Ghorbani, and M. A. Edris. 2012. Effects of betaine and sulfate supplementation on milk and wool production of Naeini ewes. *Small Ruminant Research*. 105:170-175.
- Nudda, A., R. Bencini, S. Mijatovic, and G. Pulina. 2002. The yield and composition of milk in Sarda, Awassi, and Merino Sheep milked unilaterally at different frequencies. *Journal of Dairy Science*. 85:2879-2884.
- Obeidat, B. S., M. S. Awawdeh, R. T. Kridli, H. J. Al-Tamimi, M. A. Ballou, M. D. Obeidat, M. A. Abu Ishmais, F. A. Al-Lataifeh, and H. S. Subih. 2014. Feeding corn silage improves nursing performance of Awassi ewes when used as a source of forage compared to wheat hay. *Animal Feed Science and Technology*. 192:24-28.
- Oravcová, M., M. Margetín, D. Peškovičová, J. Daňo, M. Milerski, L. Hetényi, and P. Polák. 2006. Factors affecting milk yield and ewe's lactation curves estimated with test-day models. *Czech Journal of Animal Science*. 51:483-490.
- Oravcová, M., M. Margetín, D. Peškovičová, J. Daňo, M. Milerski, L. Hetényi, and P. Polák. 2007. Factors affecting ewe's milk fat and protein content and relationships between milk yield and milk components. *Czech Journal of Animal Science*. 52:189-198.
- Oravcová, M., M. Margetín, and V. Tančin. 2015. The effect of stage of lactation on daily milk yield, and milk fat and protein content in Tsigai and Improved Valachian ewes. *Mljekarstvo*. 65:48-56.
- Pacinovski, N., V. Dzabirski, D. Nakov, K. Porcu, M. Trajchev, G. Cilev, and E. Joshevska. 2016. Effects of non-genetic factors on daily milk production in Awassi breed of sheep in Macedonia. *Agriculture and Forestry*. 62:35-44.
- Papachristoforou, C., A. Roushias, and A. P. Mavrogenis. 1982. The effect of milking frequency on the milk production of Chios ewes and Damascus goats. *Annales de Zootechnie*. 31:37-46.

- Papadopoulos, G., C. Goulas, E. Apostolaki, and R. Abril. 2002. Effects of dietary supplements of algae, containing polyunsaturated fatty acids, on milk yield and the composition of milk products in dairy ewes. *The Journal of Dairy Research*. 69:357-365.
- Ploumi, K., S. Belibasaki, and G. Triantaphyllidis. 1998. Some factors affecting daily milk yield and composition in a flock of Chios ewes. *Small Ruminant Research*. 28:89-92.
- Polychroniadou, A., and A. Vafopoulou. 1985. Variations of major mineral constituents of ewe milk during lactation. *Journal of Dairy Science*. 68:147-150.
- Prpic, Z., I. Vnucec, M. BENIC, and B. Mioc. 2016. Relationship of litter size with milk yield, udder morphology and udder health of East Friesian sheep. *Journal of Central European Agriculture*. 17:1331-1345.
- Ramón, M., C. Díaz, M. D. Pérez-Guzman, and M. J. Carabaño. 2016. Effect of exposure to adverse climatic conditions on production in Manchega dairy sheep. *Journal of Dairy Science*. 99:5764-5779.
- Sakul, H., and W. J. Boylan. 1992. Evaluation of U.S. sheep breeds for milk production and milk composition. *Small Ruminant Research*. 7:195-201.
- Selvaggi, M., A. G. D'Alessandro, and C. Dario. 2016. Environmental and genetic factors affecting milk yield and quality in three Italian sheep breeds. *Journal of Dairy Research*. 1-5.
- Sevi, A., M. Albenzio, G. Annicchiarico, M. Caroprese, R. Marino, and A. Santillo. 2006. Effects of dietary protein level on ewe milk yield and nitrogen utilization, and on air quality under different ventilation rates. *Journal of Dairy Research*. 73:197-206.
- Sevi, A., L. Taibi, M. Albenzio, A. Muscio, and G. Annicchiarico. 2000. Effect of parity on milk yield, composition, somatic cell count, renneting parameters and bacteria counts of Comisana ewes. *Small Ruminant Research*. 37:99-107.
- Skoufos, I., A. Tzora, I. Giannenas, A. Karamoutsios, G. Tsangaris, and G. C. Fthenakis. 2016. Milk quality characteristics of Boutsiko, Frisarta and Karagouniko sheep breeds reared in the mountainous and semimountainous areas of Western and Central Greece. *International Journal of Dairy Technology*. 69:1-9.
- Ticiani, E., E. C. Sandri, J. D. Souza, F. Batistel, and D. E. D. Oliveira. 2013. Persistência da lactação e composição do leite em ovelhas leiteiras das raças Lacaune e East Friesian. *Ciência Rural*. 43:1650-1653.
- Tufarelli, V., M. Dario, and V. Laudadio. 2009. Milk yield and composition of lactating Comisana ewes fed total mixed rations containing nitrogen sources with different ruminal degradability. *Livestock Science*. 122:349-353.
- Wohlt, J. E., D. H. Kleyn, G. W. Vandernoot, D. J. Selfridge, and C. A. Novotney. 1981. Effect of stage of lactation, age of ewe, sibling status, and sex of lamb on gross and minor constituents of Dorset ewe milk. *Journal of Dairy Science*. 64:2175-2184.

### **Goat Breeds**

- Abd-Allah, S., R. Salama, M. I. Mohamed, M. M. Mabrouk, R. I. EL-Kady, A. I. Kadry, and S. M. Ahmed. 2015. A comparative study on reproductive and productive performance of Boer and Baladi goats raised under similar environmental conditions in Egypt. *International Journal of ChemTech Research*. 8:225-235.
- Adarve, G. D. L. T., E. R. Morales, J. M. S. Manrique, F. G. Extremera, and M. R. Sanz Sampelayo. 2009. Milk production and composition in Malagueña dairy goats. Effect of genotype for synthesis of  $\alpha$ s1-casein on milk production and its interaction with dietary protein content. *Journal of Dairy Research*. 76 (2):137-143.
- Ahuya, C. O., J. M. K. Ojango, R. O. Mosi, C. P. Peacock, and A. M. Okeyo. 2009. Performance of Toggenburg dairy goats in smallholder production systems of the eastern highlands of Kenya. *Small Ruminant Res*. 83 (1-3):7-13.
- Ait-Saidi, A., G. Caja, S. Carne, A. A. Salama, and J. J. Ghirardi. 2008. Comparison of manual versus semiautomatic milk recording systems in dairy goats. *Journal of Dairy Science*. 91 (4):1438-1442.

- All, A. K. A., W. A. Mohammad, M. Grossman, and R. D. Shanks. 1983. Relationships among lactation and reproduction traits of dairy goats. *Journal of Dairy Science*. 66:1926-1936.
- Amorim, E. A. M. e., C. A. A. Torres, J. H. Bruschi, J. F. d. Fonseca, J. D. Guimarães, P. R. Cecon, and G. R. d. Carvalho. 2006. Produção e composição do leite, metabólitos sanguíneos e concentração hormonal de cabras lactantes da raça Toggenburg tratadas com somatotropina bovina recombinante. *Revista Brasileira de Zootecnia*. 35 (1):147-153.
- Baldin, M., R. Dresch, J. Souza, D. Fernandes, M. A. S. Gama, K. J. Harvatine, and D. E. Oliveira. 2014. CLA induced milk fat depression reduced dry matter intake and improved energy balance in dairy goats. *Small Ruminant Res.* 116 (1):44-50.
- Barbosa, L. P., M. T. Rodrigues, J. D. Guimarães, V. Maffili, S. Amorim, A. Fróes, and G. Neto. 2009. Condição corporal e desempenho produtivo de cabras Alpinas no início de lactação. *Revista Brasileira de Zootecnia*. 38:2137-2143.
- Bernard, L., C. Leroux, Y. Faulconnier, D. Durand, K. J. Shingfield, and Y. Chilliard. 2009. Effect of sunflower-seed oil or linseed oil on milk fatty acid secretion and lipogenic gene expression in goats fed hay-based diets. *Journal of Dairy Research*. 76 (2):241-248.
- Bernard, L., C. Leroux, J. Rouel, M. Bonnet, and Y. Chilliard. 2012. Effect of the level and type of starchy concentrate on tissue lipid metabolism, gene expression and milk fatty acid secretion in Alpine goats receiving a diet rich in sunflower-seed oil. *British Journal of Nutrition*. 107 (8):1147-1159.
- Bernard, L., C. Leroux, J. Rouel, C. Delavaud, K. J. Shingfield, and Y. Chilliard. 2015. Effect of extruded linseeds alone or in combination with fish oil on intake, milk production, plasma metabolite concentrations and milk fatty acid composition in lactating goats. *Animal*. 9 (5):810-821.
- Bernard, L., J. Mourirot, J. Rouel, F. Glasser, P. Capitan, E. Pujos-Guillot, J. M. Chardigny, and Y. Chilliard. 2010. Effects of fish oil and starch added to a diet containing sunflower-seed oil on dairy goat performance, milk fatty acid composition and in vivo delta9-desaturation of [13C]vacenic acid. *British Journal of Nutrition*. 104 (3):346-354.
- Câmara, C. S., A. A. Alves, M. A. Moreira Filho, B. S. Garcez, and D. M. M. R. Azevêdo. 2015. Diets containing leucaena or estilosantes hay in lactating mixed-breed Anglo-Nubian goats. *Revista Ciência Agronômica*. 46 (2):443-450.
- Canizares, G. I. L., H. C. Goncalves, C. Costa, L. Rodrigues, J. J. L. de Menezes, H. F. B. Gomes, R. O. Marques, and R. H. Branco. 2011. Use of high moisture corn silage replacing dry corn on intake, apparent digestibility, production and composition of milk of dairy goats. *Revista Brasileira de Zootecnia*. 40 (4):860-865.
- Carnicella, D., M. Dario, M. C. C. Ayres, V. Laudadio, and C. Dario. 2008. The effect of diet, parity, year and number of kids on milk yield and milk composition in Maltese goat. *Small Ruminant Res.* 77 (1):71-74.
- Catunda, K. L., E. M. de Aguiar, P. E. de Goes Neto, J. G. da Silva, J. A. Moreira, A. H. do Nascimento Rangel, and D. M. de Lima Junior. 2016. Gross composition, fatty acid profile and sensory characteristics of Saanen goat milk fed with Cacti varieties. *Tropical Animal Health and Production*. 48 (6):1253-1259.
- Clark, S., and J. W. Sherbon. 2000. Alphas1-casein, milk composition and coagulation properties of goat milk. *Small Ruminant Res.* 38:123-134.
- Costa, R. G., E. M. Beltrao, R. D. R. D. Queiroga, M. S. Madruga, A. N. de Medeiros, and C. J. B. de Oliveira. 2010. Chemical composition of milk from goats fed with cactus pear (*Opuntia ficus-indica* L. Miller) in substitution to corn meal. *Small Ruminant Res.* 94 (1-3):214-217.
- Eik, L. O. 1991. Effects of feeding intensity during dry period on performance of dairy goats. *Small Ruminant Res.* 6 (3):223-232.
- Fernandez, C., P. Sanchez-Seiquer, A. Sanchez, A. Contreras, and J. M. de la Fuente. 2004. Influence of betaine on milk yield and composition in primiparous lactating dairy goats. *Small Ruminant Res.* 52 (1-2):37-43.
- Fonseca, C. E. M. d. R. F. D. V., Valadares, S. d. C. V. Filho, M. T. Rodrigues, M. I. Marcondes, M. Oliveira, S. Pina, and K. A. K. D. Moraes. 2006. Produção de leite em cabras alimentadas com diferentes níveis de proteína na dieta : consumo e digestibilidade dos nutrientes. *Revista Brasileira de Zootecnia*. 35:1162-1168.

- Frattini, S., L. Nicoloso, B. Coizet, S. Chessa, L. Rapetti, G. Pagnacco, and P. Crepaldi. 2014. Short communication: The Unusual genetic trend of  $\alpha$ s1-casein in Alpine and Saanen breeds. *Journal of Dairy Science*. 97:7975-7979.
- Gentil, R. S., I. Susin, A. V. Pires, C. Q. Mendes, E. M. Ferreira, F. S. Urano, R. Cedric, and M. Meneghini. 2011. Substituição do feno de coastcross por casca de soja na alimentação de cabras em lactação. *Revista Brasileira de Zootecnia*. 40:2844-2851.
- Greyling, J. P. C., V. M. Mmbengwa, L. M. J. Schwalbach, and T. Muller. 2004. Comparative milk production potential of Indigenous and Boer goats under two feeding systems in South Africa. *Small Ruminant Res.* 55 (1-3):97-105.
- Hadjipanayiotou, M. 1987. Studies on the response of lactating Damascus goats to dietary-protein. *J Anim Physiol an N.* 57 (1):41-52.
- Hadjipanayiotou, M. 1992. Effect of protein-source and formaldehyde treatment on lactation performance of Chios ewes and Damascus goats. *Small Ruminant Res.* 8 (3):185-197.
- Hadjipanayiotou, M., and A. Koumas. 1991. Effect of protein-source on performance of lactating Damascus goats. *Small Ruminant Res.* 5 (4):319-326.
- Hamzaoui, S., A. A. Salama, E. Albanell, X. Such, and G. Caja. 2013. Physiological responses and lactational performances of late-lactation dairy goats under heat stress conditions. *Journal of Dairy Science*. 96 (10):6355-6365.
- Havrevoll, O., S. P. Rajbhandari, and L. O. Eik. 1995. Effects of different energy-levels during indoor rearing on performance of Norwegian dairy goats. *Small Ruminant Res.* 15 (3):231-237.
- Herrera-Campos, L. R., C. F. Vargas-Rodríguez, C. Boschini-Figueroa, and A. Chacón Villalobos. 2009. Variación bromatológica de la leche de cabras Lamancha alimentadas con diferentes forrajes. *Agronomía Mesoamericana*. 20 (2):381-390.
- Iaschi, S. P. A., J. Hui, F. N. Chong, A. Strange, M. Strange, R. Bencini, and G. K. Tay. 2004. Comparison of the milk quality of the south African boer and Australian rangeland goats. *Small Ruminant Res.* 53 (1-2):181-184.
- Keskin, M., Y. K. Avsar, O. Bicer, and M. B. Guler. 2004. A comparative study on the milk yield and milk composition of two different goat genotypes under the climate of the eastern Mediterranean. *Turkish Journal of Veterinary & Animal Sciences*. 28 (3):531-536.
- Kholif, A. E., T. A. Morsy, A. M. Abd El Tawab, U. Y. Anele, and M. L. Galyean. 2016. Effect of supplementing diets of Anglo-Nubian goats with soybean and flaxseed oils on lactational performance. *Journal of Agricultural and Food Chemistry*. 64 (31):6163-6170.
- Kholif, A. E., T. A. Morsy, G. A. Gouda, U. Y. Anele, and M. L. Galyean. 2016. Effect of feeding diets with processed *Moringa oleifera* meal as protein source in lactating Anglo-Nubian goats. *Animal Feed Science and Technology*. 217:45-55.
- Klir, Z., J. M. Castro-Montoya, J. Novoselec, J. Molkentin, M. Domacinovic, B. Mioc, U. Dickhoefer, and Z. Antunovic. 2017. Influence of pumpkin seed cake and extruded linseed on milk production and milk fatty acid profile in Alpine goats. *Animal*. 1-7.
- Komara, M., M. Boutinaud, H. Ben Chedly, J. Guinard-Flament, and P. G. Marnet. 2009. Once-daily milking effects in high-yielding Alpine dairy goats. *Journal of Dairy Science*. 92 (11):5447-5455.
- Lerías, J. R., L. E. Hernandez-Castellano, A. Morales-Delanuez, S. S. Araujo, N. Castro, A. Arguello, J. Capote, and A. M. Almeida. 2013. Body live weight and milk production parameters in the Majorera and Palmera goat breeds from the Canary Islands: influence of weight loss. *Tropical Animal Health and Production*. 45 (8):1731-1736.
- Lima, L. S. D., C. R. Alcalde, H. S. Freitas, B. Susan, D. L. Molina, F. D. Assis, F. D. Macedo, and J. A. Horst. 2012. Short Communication: Performance of dairy goats fed diets with dry yeast from sugar cane as protein source. *Revista Brasileira de Zootecnia*. 41:232-236.

- Lock, A. L., M. Rovai, T. A. Gipson, M. J. de Veth, and D. E. Bauman. 2008. A conjugated linoleic acid supplement containing trans-10, cis-12 conjugated linoleic acid reduces milk fat synthesis in lactating goats. *Journal of Dairy Science*. 91 (9):3291-3299.
- Louca, A., A. Mavrogenis, and M. J. Lawlor. 2010. The effect of early weaning on the lactation performance of Damascus goats and the growth rate of the kids. *Animal Production*. 20 (02):213-218.
- Maia, F. J., A. F. Branco, G. F. Mouro, S. Marcantonio, G. Tadeu, T. F. Minella, and K. C. Guimarães. 2006. Inclusão de fontes de óleo na dieta de cabras em lactação: produção, composição e perfil dos ácidos graxos do leite. *Revista Brasileira de Zootecnia*. 35:1504-1513.
- Martinez Marin, A. L., P. Gomez-Cortes, A. G. Gomez Castro, M. Juarez, L. M. Perez Alba, M. Perez Hernandez, and M. A. de la Fuente. 2011. Animal performance and milk fatty acid profile of dairy goats fed diets with different unsaturated plant oils. *Journal of Dairy Science*. 94 (11):5359-5368.
- Martinez Marin, A. L., P. Gomez-Cortes, G. Gomez Castro, M. Juarez, L. Perez Alba, M. Perez Hernandez, and M. A. de la Fuente. 2012. Effects of feeding increasing dietary levels of high oleic or regular sunflower or linseed oil on fatty acid profile of goat milk. *Journal of Dairy Science*. 95 (4):1942-1955.
- Mavrogenis, A. P., and C. Papachristoforou. 2000. Genetic and phenotypic relationships between milk production and body weight in Chios sheep and Damascus goats. *Livestock Production Science*. 67 (1-2):81-87.
- Mba, A. U., B. S. Boyo, and V. A. Oyenuga. 1975. Studies on the milk composition of West African dwarf, Red Sokoto and Saanen goats at different stages of lactation. I. Total solids, butterfat, solids-not-fat, protein, lactose and energy contents of milk. *Journal of Dairy Research*. 42 (2):217-226.
- Mestawet, T. A., A. Girma, T. Adnoy, T. G. Devold, J. A. Narvhus, and G. E. Vegarud. 2012. Milk production, composition and variation at different lactation stages of four goat breeds in Ethiopia. *Small Ruminant Res.* 105 (1-3):176-181.
- Min, B. R., S. P. Hart, T. Sahlu, and L. D. Satter. 2005. The effect of diets on milk production and composition, and on lactation curves in pastured dairy goats. *Journal of Dairy Science*. 88 (7):2604-2615.
- Molina, B. S. D., C. R. Alcalde, B. Hygino, S. M. D. Santos, L. C. Gomes, and G. T. dos Santos. 2015. Inclusion of Protected Fat in Diets on the Milk Production and Composition of Saanen Goats. *Ciencia E Agrotecnologia*. 39 (2):164-172.
- Montaldo, H., A. Juarez, J. M. Berruecos, and F. Sanchez. 1995. Performance of Local Goats and Their Backcrosses with Several Breeds in Mexico. *Small Ruminant Res.* 16 (2):97-105.
- Monzon-Gil, E., J. I. R. Castanon, and M. R. Ventura. 2010. Effect of low-forage rations on milk production of dairy goats: Separate concentrate-forage versus mixed rations. *Small Ruminant Res.* 94 (1-3):196-200.
- Mouro, G. F., A. F. Branco, F. A. F. d. Macedo, L. P. Rigolon, F. J. Maia, K. C. Guimarães, J. C. Damasceno, and G. T. d. Santos. 2002. Substituição do milho pela farinha de mandioca de varredura em dietas de cabras em lactação: Produção e composição do leite e digestibilidade dos nutrientes. *Revista Brasileira de Zootecnia*. 31 (1 suppl):475-483.
- Noguera, R. R., O. Bedoya-Mejía, and S. L. Posada. 2011. Producción , composición de la leche y estatus metabólico de cabras lactantes suplementadas con ensilajes. *Livestock Research*. 23:1-14.
- Oliveira, J. B. D., A. José, V. Pires, G. G. P. De, L. Sampaio, O. Ribeiro, J. Ferreira, and F. Silva. 2010. Subprodutos industriais na ensilagem de capim-elefante para cabras leiteiras : consumo , digestibilidade de nutrientes e produção de leite. *Revista Brasileira de Zootecnia*. 39:411-418.
- Paraskevakis, N. 2015. Effects of dietary dried Greek Oregano (*Origanum vulgare ssp hirtum*) supplementation on blood and milk enzymatic antioxidant indices, on milk total antioxidant capacity and on productivity in goats. *Animal Feed Science and Technology*. 209:90-97.
- Queiroga, R. D. C. R. D. E., R. G. Costa, T. M. B. Biscontini, A. N. De Medeiros, M. S. Madruga, and A. R. P. Schuler. 2007. Influência do manejo do rebanho, das condições higiênicas da ordenha e da fase de lactação na composição química do leite de cabras Saanen. *Revista Brasileira de Zootecnia*. 36:430-437.

- Raats, J. G., P. I. Wilke, and J. E. J. DuToit. 1988. The effect of age and litter size on milk production in Boer goat ewes. *South African Journal of Animal Sciences*. 18:97-100.
- Ribeiro, L. R., J. C. Damasceno, U. Cecato, C. C. Jobim, G. T. Santos, F. A. F. Macedo, and L. G. P. Macedo. 2008. Produção, composição do leite e constituintes sanguíneos de cabras alimentadas com diferentes volumosos. *Arquivo Brasileiro de Medicina Veterinária e Zootecnia*. 60 (6):1523-1530.
- Roberto, J. V. B., B. A. D. A. Marques, B. B. Souza, S. S. Azevedo, and D. Y. C. Assis Neto. 2012. Caroço de algodão na dieta de cabras saanen no semiárido paraibano. *Revista Brasileira de Saúde e Produção Animal*. 13:271-282.
- Rubino, R., B. Muioli, V. Fedele, M. Pizzillo, and P. Morandfähr. 1995. Milk production of goats grazing native pasture under different supplementation regimes in southern Italy. *Small Ruminant Res*. 17 (3):213-221.
- Rufino, M. D. O. A., A. A. Alves, M. M. Rodrigues, R. L. Moura, A. C. R. Cavalcante, and M. C. P. Rogério. 2012. Goat milk production and quality on Tanzania-grass pastures, with supplementation. *Acta Scientiarum. Animal Sciences*. 34 (4):417-423.
- Salama, A. A., X. Such, G. Caja, M. Rovai, R. Casals, E. Albanell, M. P. Marin, and A. Marti. 2003. Effects of once versus twice daily milking throughout lactation on milk yield and milk composition in dairy goats. *Journal of Dairy Science*. 86 (5):1673-1680.
- Sanz Sampelayo, M. R., L. Perez, J. Boza, and L. Amigo. 1998. Forage of different physical forms in the diets of lactating Granadina goats: nutrient digestibility and milk production and composition. *Journal of Dairy Science*. 81 (2):492-498.
- Shetaewi, M. M., A. M. Abdel-Samee, and E. A. Bakr. 2001. Reproductive performance and milk production of Damascus goats fed acacia shrubs or berseem clover hay in North Sinai, Egypt. *Tropical Animal Health and Production*. 33 (1):67-79.
- Silva, H. G. d. O., A. J. V. Pires, F. F. d. Silva, C. M. Veloso, G. G. P. d. Carvalho, A. S. Cezário, and C. C. Santos. 2005. Farelo de cacau (*Theobroma cacao* L.) e torta de dendê (*Elaeis guineensis*, Jacq) na alimentação de cabras em lactação: consumo e produção de leite. *Revista Brasileira de Zootecnia*. 34 (5):1786-1794.
- Soares Filho, G., C. McManus, and A. d. S. Mariante. 2001. Fatores genéticos e ambientais que influenciam algumas características de reprodução e produção de leite em cabras no Distrito Federal. *Revista Brasileira de Zootecnia*. 30 (1):133-140.
- Soryal, K., F. A. Beyene, S. Zeng, B. Bah, and K. Tesfai. 2005. Effect of goat breed and milk composition on yield, sensory quality, fatty acid concentration of soft cheese during lactation. *Small Ruminant Res*. 58 (3):275-281.
- Steinshamn, H., R. A. Inglingstad, D. Ekeberg, J. Molmann, and M. Jorgensen. 2014. Effect of forage type and season on Norwegian dairy goat milk production and quality. *Small Ruminant Res*. 122 (1-3):18-30.
- Titi, H. 2011. Effects of varying levels of protected fat on performance of Shami goats during early and mid lactation. *Turkish Journal of Veterinary & Animal Sciences*. 35 (2):67-74.
- Titi, H., and W. F. Lubbadah. 2004. Effect of feeding cellulase enzyme on productive responses of pregnant and lactating ewes and goats. *Small Ruminant Res*. 52 (1-2):137-143.
- Toral, P. G., Y. Chilliard, J. Rouel, H. Leskinen, K. J. Shingfield, and L. Bernard. 2015. Comparison of the nutritional regulation of milk fat secretion and composition in cows and goats. *Journal of Dairy Science*. 98 (10):7277-7297.
- Torres, A., L. E. Hernandez-Castellano, A. Morales-delaNuez, D. Sanchez-Macias, I. Moreno-Indias, N. Castro, J. Capote, and A. Arguello. 2014. Short-term effects of milking frequency on milk yield, milk composition, somatic cell count and milk protein profile in dairy goats. *Journal of Dairy Research*. 81 (3):275-279.
- Zambom, M. A., C. R. Alcalde, D. C. D. Kazama, E. N. Martins, J. H. Hashimoto, M. Matsushita, C. E. C. O. Ramos, and P. A. Grande. 2012. Soybean hulls replacing ground corn in diets for early lactation Saanen goats: intake, digestibility, milk production and quality. *Revista Brasileira de Zootecnia*. 41 (6):1525-1532.



- Zambom, M. A., C. R. Alcalde, K. T. Silva, F. D. A. F. Macedo, C. E. C. O. Ramos, and G. D. O. Passianoto. 2008. Desempenho e digestibilidade dos nutrientes de rações com casca do grão de soja em substituição ao milho para cabras Saanen em lactação e no pré-parto. *Revista Brasileira de Zootecnia*. 37:1311-1318.
- Zambom, M. A., C. R. Alcalde, K. T. d. Silva, F. d. A. F. d. Macedo, G. T. d. Santos, E. L. Borghi, and E. D. Barbosa. 2005. Ingestão, digestibilidade das rações e produção de leite em cabras Saanen submetidas a diferentes relações volumoso: concentrado na ração. *Revista Brasileira de Zootecnia*. 34 (6 suppl):2505-2514.
- Zamora, R., A. Salvador, C. Alvarado, and R. Betacourt. 2011. Producción y composición de la leche y queso fresco pasteurizado de cabras mestizas canarias suplementadas con grasa sobrepasante. *Revista de la Facultad de Ciencias Veterinarias*. 52:39-49.
- Zoa-Mboe, A., C. Michaux, J. C. Detilleux, C. Kebers, F. P. Farnir, and P. L. Leroy. 1997. Effects of parity, breed, herd-year, age, and month of kidding on the milk yield and composition of dairy goats in Belgium. *Journal of Anim Breed Genetics*. 114 (1-6):201-213.
- Zucali, M., L. Bava, C. Penati, and L. Rapetti. 2007. Effect of raw sunflower seeds on goat milk production in different farming systems. *Italian Journal of Animal Science*. 6:633-635.
